1  
2  
3  
4  
5  
6  
7  
8  
9  
10

Assessment of the performance of different hidden Markov models for imputation in animal  
breeding

Andrew Whalen, Gregor Gorjanc, Roger Ros-Freixedes, and John M Hickey

The Roslin Institute and Royal (Dick) School of Veterinary Studies, The University of  
Edinburgh, Midlothian, Scotland, UK

11 Abstract

12 In this paper we review the performance of various hidden Markov model-based imputation  
13 methods in animal breeding populations. Traditionally, heuristic-based imputation methods have  
14 been used for imputation in large animal populations due to their computational efficiency,  
15 scalability, and accuracy. However, recent advances in the area of human genetics have  
16 increased the ability of probabilistic hidden Markov model methods to perform accurate phasing  
17 and imputation in large populations. These advances may enable these methods to be useful for  
18 routine use in large animal populations. To test this, we evaluate here the accuracy and  
19 computational cost of several methods in a series of simulated populations and a real animal  
20 population. We first tested single-step (diploid) imputation, which performs both phasing and  
21 imputation. Then we tested pre-phasing followed by haploid imputation. We tested four diploid  
22 imputation methods (fastPHASE, Beagle v4.0, IMPUTE2, and MaCH), three phasing methods,  
23 (SHAPEIT2, HAPI-UR, and Eagle2), and three haploid imputation methods (IMPUTE2, Beagle  
24 v4.1, and minimac3). We found that performing pre-phasing and haploid imputation was faster  
25 and more accurate than diploid imputation. In particular, we found that pre-phasing with Eagle2  
26 or HAPI-UR and imputing with minimac3 or IMPUTE2 gave the highest accuracies in both  
27 simulated and real data.

## 28 **Introduction**

29       In this paper we review and analyse the use of hidden Markov model (HMM) based  
30 imputation methods for animal breeding populations. Genotype imputation is a key aspect of  
31 many modern animal breeding programs and allows genetic information to be obtained on a  
32 large number of animals at a low cost. When imputation is applied to a breeding program, a  
33 small subset of individuals (e.g., sires) are genotyped at high density, and the remaining animals  
34 are genotyped at a lower density. Statistical regularities between shared chromosomal segments  
35 are used to fill in the untyped loci. Modern imputation methods fill in missing genotypes at a  
36 very high accuracy (e.g., Hickey et al., 2012; Sargolzaei et al., 2011), increasing the number of  
37 animals that can be genotyped for a fixed budget. The larger pool of genotyped animals increases  
38 the accuracy of genetic predictions on all animals (Daetwyler et al., 2008) and offers the  
39 potential to increase selection intensity.

40       Traditionally, heuristic imputation methods have dominated animal breeding (Hickey et al.,  
41 2012; Sargolzaei et al., 2011; VanRaden et al., 2013). These heuristic methods use large  
42 chromosome segments shared between closely related animals to rapidly and accurately impute  
43 untyped or otherwise missing loci. In contrast, imputation methods used in human genetics have  
44 largely been based on the probabilistic HMM framework of Li and Stephens (2003). These  
45 probabilistic methods tend to have higher accuracy than heuristic methods in datasets where  
46 individuals are not closely related. However, these methods have come at too high of a  
47 computational cost for routine imputation in animal populations.

48       In the last few years, the speed of HMM methods has improved. They have been used to  
49 impute hundreds of thousands of individuals to hundreds of thousands of loci in reasonable  
50 computational time (Browning and Browning, 2016; Loh et al., 2016a). These improvements

51 have been driven by the widespread availability of large haplotype reference panels, and the  
52 emergence of a two-step imputation pipeline where observed genotypes are first phased and then  
53 untyped loci are imputed based on their phased haplotypes (Spiliopoulou et al., 2017). The  
54 improved scaling of HMMs may allow for their routine use in large animal breeding populations.  
55 However, given the lack of appropriate public domain haplotype reference panels for many  
56 animal populations, smaller population sizes, and sparser marker density, it is not clear that the  
57 advances in HMMs will be realized for animal imputation. Furthermore, there are a number of  
58 competing HMM imputation methods and it is not clear which is most suited for routine use in  
59 animal breeding.

60 In this paper we provide a high-level review of several imputation methods and study their  
61 performance on simulated and real data. We grouped comparisons based on single-step (diploid)  
62 imputation methods and a two-step combination of pre-phasing and haploid imputation methods.  
63 Specifically, for diploid imputation we test fastPHASE (Scheet and Stephens, 2006), Beagle v4.0  
64 (Browning and Browning, 2007), IMPUTE2 (Howie et al., 2009), and MaCH (Li et al., 2010).  
65 For pre-phasing we test SHAPEIT2 (Delaneau et al., 2012), HAPI-UR (Williams et al., 2012),  
66 and Eagle2 (Loh et al., 2016b), followed by haploid imputation with IMPUTE2 (Howie et al.,  
67 2009), Beagle v4.1 (Browning and Browning, 2016), or minimac3 (Das et al., 2016). We first  
68 review these methods and then evaluate the performance of these methods on simulated and real  
69 data.

## 70 **Hidden Markov Models**

71 All of the methods considered are based on Li and Stephens' (2003) HMM framework.  
72 Under this framework an individual's genotype is considered to be a mosaic of haplotypes from  
73 a haplotype reference panel  $H=\{h_1\dots h_K\}$ . The methods calculate the probability that the

74 individual has the pair of haplotypes,  $h_j$  and  $h_k$  at a locus  $i$  given the observed genotype ( $g_i$ ),  
75  $p(h_{ij}, h_{ik}/g_i)$ . To account for linkage between adjacent loci, the methods evaluate the probability of  
76 a haplotype based on its fit to the observed genotypes at the loci and its similarity to the  
77 haplotypes inferred at nearby loci:

$$78 \quad p(h_{ij}, h_{ik}/g) = p(h_{ij}, h_{ik}/g_i)p(h_{ij}, h_{ik}/h_{i-1}, h_{i+1})p(h_{i-1}/g_{-i})p(h_{i+1}/g_{+i}). \quad (1)$$

79 The term  $p(h_{ij}, h_{ik}/g_i)$  measures the fit between the pair of haplotypes and the observed genotype  
80 at a locus. The term  $p(h_{ij}, h_{ik}/h_{i-1}, h_{i+1})$  captures transitions between haplotypes given the  
81 haplotypes at neighbouring loci. The terms  $p(h_{i-1}/g_{-i})$  and  $p(h_{i+1}/g_{+i})$  measure the fit between  
82 haplotypes and observed genotypes at the remaining loci. These probabilities can be calculated  
83 using the standard forward-backward algorithm (Rabiner, 1989).

84 Traditionally, methods that rely on the Li and Stephens framework scale linearly with  
85 both the number of individuals and the number of loci and quadratically with the number of  
86 reference haplotypes. The quadratic scaling is due to phase uncertainty at heterozygous loci,  
87 requiring the methods to model haplotypes assigned on both chromosomes simultaneously. The  
88 quadratic scaling quickly leads to intractable computational costs even for small reference  
89 panels, but can be avoided if the low-density individuals are pre-phased, which allows  
90 haplotypes to be considered independently. Haploid imputation, imputation with pre-phased  
91 haplotypes, therefore scales linearly with the number of individuals, number of loci, and number  
92 of reference haplotypes.

93 In this paper we consider two classes of HMMs. In the first class, diploid imputation  
94 methods perform phasing and imputation simultaneously, resulting in quadratic scaling with the  
95 reference panel size. To mitigate this issue, each of the evaluated methods, fastPHASE, Beagle  
96 v4.0, IMPUTE2, and MACH, employ their own strategy to reduce the effective number of

97 reference haplotypes while maintaining high accuracy. In contrast, two-step imputation methods  
98 treat phasing and imputation as separate problems. Individuals are first phased and then imputed  
99 using a haploid HMM which scales linearly with the number of reference haplotypes. Phasing  
100 methods may have either quadratic, super-linear, or linear dependence on the number of  
101 reference haplotypes. A number of tricks are deployed to increase phasing speed and accuracy  
102 that would not be applicable if the phasing methods also needed to handle genotype uncertainty  
103 at untyped loci.

104 Intuitively, we might expect that the diploid imputation methods will have higher  
105 accuracy (at a higher computational cost) than separately performing phasing and imputation  
106 because they automatically handle phase uncertainty. This is not necessarily the case if most  
107 errors in imputation stem from the inability to find appropriate reference haplotypes that would  
108 explain observed genotypes. By performing pre-phasing and then imputation, it may be possible  
109 to consider a much larger number of reference haplotypes and thereby increase accuracy by  
110 finding a more appropriate set of reference haplotypes which offset accuracy losses due to  
111 phasing errors.

112 Below we review methods for diploid imputation, haploid imputation, and phasing.

### 113 **Diploid imputation**

114 All four diploid imputation methods utilize a haplotype state-space reduction technique to  
115 alleviate the impact of modelling a large number of haplotype reference panels. IMPUTE2 and  
116 MaCH use subsampling, where the haplotypes considered in each iteration are a sample of the  
117 total haplotype pool. fastPHASE and Beagle v4.0 use haplotype clustering, where the overall  
118 number of haplotypes is collapsed into a smaller number of “ancestral” haplotypes.

119           In the case of IMPUTE2 and MaCH, each method is run over a series of iterations, and at  
120 each iteration a subset of the haplotype reference panel is used to phase and impute individual's  
121 genotypes. In MaCH, the subset is selected randomly. In IMPUTE2, the subset is selected to be  
122 made up of haplotypes that are “nearby” the currently estimated haplotype for the individual. If  
123 these methods are run without an external reference panel, a reference panel is built up from the  
124 current phasing of high-density individuals. At each iteration, a new subset of the reference panel  
125 is selected for each individual, individuals are imputed and phased based on that subset, and  
126 then a reference panel is re-computed from the currently inferred haplotypes. The methods are  
127 run for a small number of iterations (e.g., 20) and the imputation results are averaged across  
128 iterations. There is a potential danger in applying these methods in populations of many closely  
129 related individuals, due to the potential for feedback between the phasing of closely related  
130 relatives (Nettelblad, 2013).

131           In contrast, in fastPHASE and Beagle v4.0 individuals are imputed based on a set of  
132 estimated “ancestral” haplotypes. In fastPHASE, an expectation-maximisation (EM) algorithm is  
133 used to infer a small number of ancestral haplotypes from the data (e.g., 30) and then iterates  
134 between estimating the haplotypes of each individual as a mosaic of ancestral haplotypes, and  
135 estimating the ancestral haplotypes based on the haplotype assignments of each individual.  
136 Beagle v4.0 uses a similar approach as fastPHASE, but instead of using a fixed number of  
137 ancestral haplotypes, it infers the number of ancestral haplotypes at each marker and models the  
138 transition between ancestral states at adjacent markers in the form of a directed acyclic graph.

### 139 **Haploid imputation**

140           In contrast to the four diploid methods, haploid methods do not need to use a state-space  
141 reduction technique to handle moderate numbers of haplotypes, because they consider each

142 phased chromosome independently and scale linearly with the number of haplotypes in the  
143 reference panels. However, with the recent focus of imputing large bio-bank size human  
144 populations (over 100,000 individuals) to whole genome sequence level data, many of the  
145 current haploid methods utilize techniques to reduce the computational burden when analyzing  
146 large numbers of individuals at a large number of markers.

147         The haploid HMM used by Impute2 is a straightforward extension of the diploid method  
148 implemented in the same program. It uses a subset of haplotypes (based on their similarity to the  
149 individual's current phasing) to impute individuals. Minimac3 uses a similar technique, but  
150 instead of subsetting the reference panel it uses a loss-less haplotype compression technique that  
151 combines haplotypes that are identical in a region and updates the likelihood of those haplotypes  
152 simultaneously. This update is particularly useful for whole genome sequence data where there  
153 may be limited haplotype variation over long windows. Beagle v4.1 moves away from the graph-  
154 based haplotype model in Beagle v4.0 and uses a more traditional Li and Stephens model. To  
155 reduce computational burden, Beagle v4.1 aggregates adjacent loci together into strings and  
156 performs updates based on strings instead of individual markers. In addition it only updates the  
157 haplotype probabilities at genotyped loci and linearly interpolates the haplotype probabilities at  
158 untyped loci.

### 159 **Pre-phasing methods**

160         Just as with diploid imputation, HMM-based phasing methods naively scale quadratically  
161 with the number of haplotypes in the reference panel. However, this quadratic scaling can be  
162 avoided by a state-space reduction technique of splitting the chromosomes into small windows,  
163 and assuming that linkage information decays quickly across the window boundaries. Both



164 SHAPEIT2 and HAPI-UR utilize a window-based approach, whereas Eagle2 manages the  
165 quadratic dependence by performing a limited beam search through the haplotype space.

166 SHAPEIT2 operates by splitting the chromosome into small haplotype windows, each  
167 containing three heterozygous loci. For each window, there are  $2^3=8$  possible ways to phase it,  
168 and there are  $2^6=64$  possible transitions between windows. SHAPEIT2 evaluates the probability  
169 of each of the 8 possible haplotypes and 64 transitions based on a haplotype reference panel, and  
170 then phases individuals by sampling haplotypes based on their posterior probabilities. The  
171 probability of a haplotype in a given window, and transition between windows can be evaluated  
172 in a time that scales linearly with the number of reference haplotypes. As in IMPUTE2,  
173 SHAPEIT2 subsets the haplotype reference panel by selecting haplotypes that are nearby the  
174 current haplotypes of the individual.

175 The window splitting approach may lead to reduced accuracy in animal breeding  
176 populations, where individuals are expected to share long chromosome segments. In SHAPEIT2  
177 only the between-window transmission probabilities are modeled, and not the probabilities of the  
178 underlying reference haplotypes. This means that haplotype assignment information from a given  
179 window is only used to update the next window and is ignored for further windows. This  
180 approach limits the amount of long range haplotype information (covering more than 3  
181 heterozygous loci) that can be exploited. One solution to this is to increase the size of the  
182 windows.

183 HAPI-UR takes a similar approach to SHAPEIT2 in reducing the large state-space, but  
184 uses a series of growing windows which allow it to exploit longer shared chromosomal  
185 segments. In order to process large windows, HAPI-UR takes advantage of a number of  
186 computational tricks to drastically reduce computation time. Unlike most methods that assume a

187 small error rate for observed genotypes (to cover genotyping errors, errors in the reference panel,  
188 and mutations from the ancestral state), HAPI-UR sets the probability of all reference haplotypes  
189 that disagree with the observed haplotype to 0. This allows the evaluation of which haplotypes fit  
190 an individual's chromosome to be re-formulated as a bit-wise set-intersection operation. In  
191 addition to this, HAPI-UR uses a structured representation of the reference haplotypes that  
192 allows for fast lookups of matching haplotypes, and for each individual creates individual  
193 specific diploid HMM, which ignores all haplotypes that disagree with homozygote sites. Instead  
194 of using a fixed window size, HAPI-UR uses dynamic windows which start small (4 markers)  
195 and grows to a user specified maximum (e.g. 64 markers) allowing the method to capture longer  
196 chromosome segments.

197 Eagle2 takes a different approach to phasing individuals by not using a window-based  
198 haplotype representation. Instead Eagle2 uses a highly efficient reference haplotype storage  
199 method based on the positional Burrows-Wheeler Transform (Durbin, 2014) to allow for looking  
200 up consistent haplotype pairs in constant time. Instead of employing a full HMM to evaluate all  
201 possible haplotypes, Eagle2 employs a beam search to search through only the most promising  
202 paths through the space of all possible haplotype pairs. At each heterozygous locus, these paths  
203 branch into two possible sub-paths based on the two phasing options. Low probability paths are  
204 pruned or merged to keep the overall number of paths small. To decrease the impact that errors  
205 in one part of the genome have on subsequent paths, haplotypes are called after 20 markers  
206 allowing for the back-propagation of relevant genetic information while decreasing the potential  
207 impact of genotyping errors. Absence of approximate window-based haplotype representation  
208 makes Eagle2 particularly appealing for animal populations, where a large number of close  
209 relatives share long chromosome segments.

## 210 **Materials and Methods**

211 We evaluated the performance of the four diploid imputation methods, fastPHASE,  
212 Beagle v4.0, IMPUTE2, and MaCH and the three phasing methods, SHAPEIT2, HAPI-UR, and  
213 Eagle2 followed by three haploid imputation methods, IMPUTE2, Beagle v4.1, and minimac3 on  
214 a series of simulated datasets and a real dataset.

215 The simulated dataset modelled a cattle population. The population consisted of 5  
216 generations of 2,000 animals, genotyped on a single chromosome. Each generation was produced  
217 by selecting 100 sires from the previous generation based on their true breeding values and  
218 randomly mating them with 1,000 dams. The initial set of haplotypes was sampled using a  
219 Markovian Coalescent Simulator (Chen et al., 2009) assuming a single 100-cM long  
220 chromosome simulated using a per site mutation rate of  $2.5 \times 10^{-8}$ , and an effective population  
221 size ( $N_e$ ) that changed over time. Based on estimates for the Holstein cattle population (Villa-  
222 Angulo et al., 2009), the  $N_e$  was set to 100 in the final generation of simulation and to 1256,  
223 4350, and 43 500 at 1000, 10 000, and 100 000 generations ago, with linear changes in between.  
224 The simulation of breeding values and progeny's haplotypes were performed using AlphaSim  
225 (Faux et al., 2016).

226 In the baseline scenario, a single chromosome was genotyped either with a high-density  
227 array of 1,000 SNP (allele frequency greater than 0.01) or with a low-density array of 200 SNP,  
228 evenly spaced across the high-density array. All of the sires and 100 dams were genotyped at  
229 high density. The remaining animals were genotyped at low density. To test the robustness of  
230 each method we independently modified the baseline scenario by varying:

- 231 • the number of SNP in the low-density array from 5 to 400,
- 232 • the number of individuals in the population from 200 to 10,000, and

- 233 • the number of genotyped dams from 0 to 500.
- 234 • We also considered the case when the first two generations were genotyped on a different
- 235 high-density array from the next two generations, with either 25, 50, or 75% of SNP
- 236 overlapping between the two high-density arrays.

237 To compare the methods on a real data set, we performed imputation on 56,607

238 individuals from a commercial pig breeding program. These animals were genotyped either with

239 a high-density array of 60,000 SNP or 80,000 SNP or a low-density array of 15,000 SNP. To

240 estimate imputation accuracy, we selected 500 high-density animals (typed at 60,000 SNPs) and

241 masked them to mimic the pattern of missingness found in the SNP of 500 low-density animals.

242 We restricted imputation to chromosome 1.

243 Accuracy was measured with the correlation between animals' imputed genotypes and

244 their true genotypes for each animal separately and averaged over all animals. We did not assess

245 phase accuracy independent of the resulting imputation accuracy.

246 For the simulated datasets, each method was given 8GB of memory and 24 hours to run.

247 Jobs were terminated if they exceeded the runtime or the memory requirements. Unless

248 otherwise specified, we used the default parameters for each simulation. We tested IMPUTE2

249 using either the default 10-cM windows or the entire chromosome and found that imputing the

250 entire chromosome increased accuracy at the cost of additional computational time. We used 5-

251 cM windows with an overlap of 1 cM for Beagle v4.0 and Beagle v4.1. The real dataset was

252 imputed with only the two-step imputation methods given their high accuracy and low runtimes.

253 In all cases, the high-density individuals and low-density individuals were phased

254 separately. For the case of multiple high-density arrays, we used the "merge\_ref\_panels" option

255 in IMPUTE2 and phased both high-density arrays separately. Because neither minimac3 or

256 Beagle v4.1 accept multiple high-density arrays, we phased the high-density individuals together  
257 and let the phasing method fill in the missing genotypes for high-density individuals.

## 258 **Results**

### 259 **Accuracy**

260 The performance of diploid imputation methods is given in Figure 1. Among the diploid  
261 imputation methods, MaCH performs well in most settings. Its accuracy depends slightly on the  
262 number of high-density dams, the number of low-density SNPs, and the overlap between high-  
263 density arrays. The performance of fastPHASE was similar to that of MaCH, but performed  
264 better when there were a small number of high-density animals or small overlap between high-  
265 density arrays. IMPUTE2 had similar accuracy to MaCH, but performed worse when given a  
266 small number of high-density dams, or a small number of individuals, and performed better than  
267 MaCH when a large number of high-density dams were given. Beagle v4.0 performed similarly  
268 to IMPUTE2, but was less affected by the number of high-density dams and number of  
269 individuals.

270 The performance of pre-phasing and haploid imputation methods is given in Figure 2.  
271 Among these methods, we found that the combination of Eagle2 and IMPUTE2 gave the highest  
272 imputation accuracy. Eagle2 led to the highest downstream imputation accuracy regardless of the  
273 imputation method, and led to higher accuracies than any of the diploid imputation methods.  
274 SHAPEIT2 led to similar but slightly lower performance than Eagle2. HAPI-UR led to the  
275 lowest overall performance. Of the tested haploid imputation methods we found only a small  
276 difference between IMPUTE2 and Minimac3, but found that Beagle v4.1 had poor imputation  
277 accuracy in all tested scenarios. We re-ran Beagle v4.1 with different-sized windows but did not  
278 see a noticeable increase in accuracy. There was no interaction between the choice of phasing

279 method and the choice of imputation method for the overall imputation accuracy with the  
280 exception of when multiple high-density arrays were used. In this case the combination of HAPI-  
281 UR and minimac3 outperformed the combination of Eagle2 and minimac3.

## 282 **Run time and memory requirements**

283 The elapsed run time of each method in the baseline scenario is given in Table 1. We  
284 found that of the diploid imputation methods, MaCH had the lowest run time followed by Beagle  
285 v4.0, fastPHASE, and IMPUTE2. Of the phasing methods, HAPI-UR was the fastest by an order  
286 of magnitude, followed by Eagle2 and SHAPEIT2. Of the haploid imputation methods,  
287 minimac3 was the fastest followed by Beagle v4.1 and IMPUTE2. The combined run-times of  
288 the two-step phasing and imputation methods were all substantially lower than that of the single  
289 step methods.

## 290 **Real Data**

291 The performance on the real dataset was similar and is given in Table 4. The imputation  
292 accuracy of Eagle2 with minimac3 was 0.992, with Beagle v4.1 was 0.925, and with IMPUTE2  
293 was 0.827. The imputation accuracy of HAPI-UR with minimac3 was 0.995%, with Beagle v4.1  
294 was 0.939%, and with IMPUTE2 was 0.997%. Phasing with Eagle2 took 7 hours distributed  
295 across 8 cores. Phasing with HAPI-UR took 54 hours on a single core. All of the haploid  
296 imputation methods took under 6 hours. SHAPEIT2 was not able to phase the high-density and  
297 low-density individuals in 4 days and so was not analysed.

## 298 **Discussion**

299 In this paper we evaluated the performance of HMM based imputation methods for  
300 imputation in animal populations. We found that combinations of phasing and haploid  
301 imputation methods provide increased imputation accuracy at substantially reduced runtimes

302 compared to diploid imputation methods. The combination of using Eagle2 to pre-phase  
303 individuals and using minimac3 to impute the data lead to high accuracy imputation in a wide  
304 range of simulation scenarios and when analysing a real animal population.

305         The results of this paper highlight the power of separately phasing and imputing  
306 individuals. Intuitively it makes sense that performing phasing and imputation in a single step  
307 may increase imputation accuracy by marginalizing over uncertainty in phasing. However, the  
308 results here suggest that the additional accuracy lost by marginalizing over phasing errors is  
309 outweighed by the accuracy gained by considering larger haplotype reference panels. These  
310 results are particularly surprising in the context of animal populations where pre-existing  
311 reference panels may not exist (at least in the public domain), and so the reference panel itself is  
312 inferred by phasing high-density genotyped individuals. Our results suggest that modern phasing  
313 methods have a sufficiently high accuracy such that this phasing leads to only a small number of  
314 errors.

315         The performance of pre-phasing and haploid imputation is also surprising given the lower  
316 density of SNP arrays (both high-density and low-density), and the substantially lower number of  
317 overall individuals compared to human studies. We found that pre-phasing and haploid  
318 imputation was more effective than the best performing diploid imputation method even for a  
319 very small number of low-density markers or, low number of high-density dams, and low  
320 numbers of individuals.

321         Of the three phasing methods we tested, using Eagle2 led to the most accurate  
322 downstream imputation. This is likely due to the fact that Eagle2 is able to exploit longer  
323 segments of shared haplotypes between individuals, which are very common in highly related  
324 animal populations. Although Eagle2 led to the highest accuracy, we found that HAPI-UR was

325 an order of magnitude faster for most datasets and resulted in a small decrease in accuracy on the  
326 simulated scenarios, but no decrease in accuracy on the real dataset. In their original paper, the  
327 authors of HAPI-UR suggest that it may be possible to increase the accuracy of HAPI-UR by  
328 running it multiple times with different window start positions and taking the consensus phase  
329 (Williams et al., 2012). Due to the low run time, this strategy would be feasible in animal  
330 populations but was not analysed here. SHAPEIT2, the oldest of the phasing methods had both  
331 the longest run-time which prevented us from evaluating it on the real dataset. Although the  
332 authors of SHAPEIT2 have now released SHAPEIT3, they do not recommend using it for  
333 populations of under 60,000 individuals and so the performance of SHAPEIT3 was not analysed  
334 here.

335 We found little difference in the performance of the assessed haploid imputation  
336 methods. Both Minimac3 and IMPUTE2 lead to accurate imputation. The accuracy of IMPUTE2  
337 was consistently slightly (<1%) higher than that of minimac3 in simulated data, but the runtime  
338 was between two and three times that of minimac3. On the real dataset, the imputation accuracy  
339 of IMPUTE2 dropped when Eagle2 was used to pre-phase the data, but remained high when  
340 HAPI-UR was used to pre-phase the data. Overall the performance of Beagle v4.1 was poor for  
341 performing haploid imputation, although improved when analysing the real data set. This may be  
342 a result of the approximations used in Beagle v4.1, which were designed for imputation of  
343 human high-density SNP arrays to whole genome sequence data. These approximations seem  
344 less appropriate for low-density SNP arrays used in some animal populations.

345 With two exceptions, we found little interaction between the choice of phasing method  
346 and the choice of haploid imputation method. The first exception came in the performance of  
347 HAPI-UR when individuals were genotyped with multiple, semi-overlapping, SNP arrays. In this



348 case the performance of HAPI-UR with minimac3 or Beagle v4.1 was substantially higher than  
349 the performance of Eagle2 with minimac3 or Beagle v4.1, although the accuracy of HAPI-UR  
350 with IMPUTE2 remained lower than that of Eagle2 with IMPUTE2. The underlying reason for  
351 this difference stems from the fact that in the case of minimac3 and Beagle v4.1 the phasing  
352 algorithms were also used to perform imputation on the missing non-overlapping SNPs in each  
353 high-density array, whereas in IMPUTE2 the two high-density arrays were phased separately,  
354 and IMPUTE2 was used to fill in missing SNPs as part of its high-density array merging step.  
355 The increased accuracy with HAPI-UR over Eagle2 in this scenario suggests that HAPI-UR can  
356 impute untyped loci in high-density arrays better than Eagle2. This is consistent with the second  
357 exception where HAPI-UR led to as high imputation accuracy, if not higher, as Eagle2 when  
358 performing imputation on the real dataset. Animals in the real dataset were genotyped with two  
359 high-density arrays, and two low-density arrays, and also exhibited a number of spontaneously  
360 missing SNPs. When using Eagle2 to phase individuals, IMPUTE2 and Beagle v4.1 markedly  
361 decreased in performance, particularly compared to minimac3. In contrast when HAPI-UR was  
362 used to phase individuals the performance of minimac3, IMPUTE2 and Beagle v4.1 remained  
363 high, suggesting an advantage of using HAPI-UR over Eagle2 when individuals are genotyped  
364 on multiple arrays or when observing a large amount of spontaneous missingness.

365         Some of the analysed phasing methods have an option to use pedigree information to  
366 improve phasing. Although these options were originally designed to help phase and impute  
367 parent-progeny trios (Browning and Browning, 2009), they can also be used for larger pedigrees  
368 (O'Connell et al., 2014). Previous work in phasing and imputing animal populations has found  
369 that combining pedigree and linkage information can improve phasing and imputation accuracy  
370 (Hickey et al., 2012). In this paper, we did not analyse the option to use pedigree information,

371 but focused solely on HMMs based methods that use linkage-disequilibrium information for  
372 phasing and imputation as originally proposed by Li and Stephens (2003). SHAPEIT2  
373 (O’Connell et al., 2014), Beagle v4.0 (Browning and Browning, 2009), and HAPI-UR (Williams  
374 et al., 2012) all provide options to use parent-progeny trio information. However, the two top  
375 performing methods, Eagle2 and minimac3, do not provide this option. Future work is needed to  
376 analyse how HMMs can utilize pedigree information to improve phasing and imputation, and to  
377 merge these insights with high-performance methods reviewed and tested here.

378 Overall, this study suggests that modern pre-phasing and haploid imputation methods can  
379 perform fast and accurate imputation of animal populations of any size. We noticed no  
380 disadvantage of using the two-step imputation approach even in cases of small populations, low-  
381 density SNP arrays, or multiple high-density arrays. Of the algorithms, we found that Eagle2 and  
382 HAPI-UR both reliably pre-phased the data and that IMPUTE2 and minimac3 lead to the highest  
383 imputation accuracy. However, we also noted a decreased accuracy when Eagle2 and IMPUTE2  
384 were used to pre-phase and impute the data when animals were genotyped with semi-overlapping  
385 high-density SNP arrays. In this case the usage of Eagle 2 with minimac3 and HAPI-UR with  
386 IMPUTE2 or minimac3 lead to high accuracy. Overall, the results of these studies highlight the  
387 importance and feasibility of using HMMs to perform imputation in animal populations even as  
388 an increasing number of animals are genotyped and as genotyping densities increase.

### 389 **Acknowledgements**

390 The authors acknowledge the financial support from the BBSRC ISPG to The Roslin  
391 Institute BB/J004235/1, from Genus PLC and from Grant Nos. BB/M009254/1, BB/L020726/1,  
392 BB/N004736/1, BB/N004728/1, BB/L020467/1, BB/N006178/1 and Medical Research Council

- 393 (MRC) Grant No. MR/M000370/1. This work has made use of the resources provided by the
- 394 Edinburgh Compute and Data Facility (ECDF) (<http://www.ecdf.ed.ac.uk>).

395

## References

- 396 Browning, B.L., and Browning, S.R. (2009). A Unified Approach to Genotype Imputation and  
397 Haplotype-Phase Inference for Large Data Sets of Trios and Unrelated Individuals. *Am. J. Hum.*  
398 *Genet.* *84*, 210–223.
- 399 Browning, B.L., and Browning, S.R. (2016). Genotype Imputation with Millions of Reference  
400 Samples. *Am. J. Hum. Genet.* *98*, 116–126.
- 401 Browning, S.R., and Browning, B.L. (2007). Rapid and accurate haplotype phasing and missing-  
402 data inference for whole-genome association studies by use of localized haplotype clustering.  
403 *Am. J. Hum. Genet.* *81*, 1084–1097.
- 404 Chen, G.K., Marjoram, P., and Wall, J.D. (2009). Fast and flexible simulation of DNA sequence  
405 data. *Genome Res.* *19*, 136–142.
- 406 Daetwyler, H.D., Villanueva, B., and Woolliams, J.A. (2008). Accuracy of Predicting the  
407 Genetic Risk of Disease Using a Genome-Wide Approach. *PLoS ONE* *3*, e3395.
- 408 Das, S., Forer, L., Schönherr, S., Sidore, C., Locke, A.E., Kwong, A., Vrieze, S.I., Chew, E.Y.,  
409 Levy, S., McGue, M., et al. (2016). Next-generation genotype imputation service and methods.  
410 *Nat. Genet.* *advance online publication*.
- 411 Delaneau, O., Marchini, J., and Zagury, J.-F. (2012). A linear complexity phasing method for  
412 thousands of genomes. *Nat Meth* *9*, 179–181.
- 413 Durbin, R. (2014). Efficient haplotype matching and storage using the positional Burrows-  
414 Wheeler transform (PBWT). *Bioinformatics* *30*, 1266–1272.
- 415 Faux, A.-M., Gorjanc, G., Gaynor, R.C., Battagin, M., Edwards, S.M., Wilson, D.L., Hearne,  
416 S.J., Gonen, S., and Hickey, J.M. (2016). AlphaSim: Software for Breeding Program Simulation.  
417 *Plant Genome* *9*.
- 418 Hickey, J.M., Kinghorn, B.P., Tier, B., van der Werf, J.H., and Cleveland, M.A. (2012). A  
419 phasing and imputation method for pedigreed populations that results in a single-stage genomic  
420 evaluation. *Genet. Sel. Evol.* *44*, 11.
- 421 Howie, B.N., Donnelly, P., and Marchini, J. (2009). A flexible and accurate genotype imputation  
422 method for the next generation of genome-wide association studies. *PLoS Genet.* *5*, e1000529.
- 423 Li, N., and Stephens, M. (2003). Modeling linkage disequilibrium and identifying recombination  
424 hotspots using single-nucleotide polymorphism data. *Genetics* *165*, 2213–2233.
- 425 Li, Y., Willer, C.J., Ding, J., Scheet, P., and Abecasis, G.R. (2010). MaCH: using sequence and  
426 genotype data to estimate haplotypes and unobserved genotypes. *Genet. Epidemiol.* *34*, 816–834.

- 427 Loh, P.-R., Danecek, P., Palamara, P.F., Fuchsberger, C., Reshef, Y.A., Finucane, H.K.,  
428 Schoenherr, S., Forer, L., McCarthy, S., Abecasis, G.R., et al. (2016a). Reference-based phasing  
429 using the Haplotype Reference Consortium panel. *Nat. Genet.* 48, 1443–1448.
- 430 Loh, P.-R., Danecek, P., Palamara, P.F., Fuchsberger, C., A Reshef, Y., K Finucane, H.,  
431 Schoenherr, S., Forer, L., McCarthy, S., Abecasis, G.R., et al. (2016b). Reference-based phasing  
432 using the Haplotype Reference Consortium panel. *Nat. Genet.* 48, 1443–1448.
- 433 Nettelblad, C. (2013). Breakdown of methods for phasing and imputation in the presence of  
434 double genotype sharing. *PLoS One* 8, e60354.
- 435 O’Connell, J., Gurdasani, D., Delaneau, O., Pirastu, N., Ulivi, S., Cocca, M., Traglia, M., Huang,  
436 J., Huffman, J.E., and Rudan, I. (2014). A general approach for haplotype phasing across the full  
437 spectrum of relatedness. *PLoS Genet.* 10, e1004234.
- 438 Rabiner, L. (1989). A tutorial on hidden Markov models and selected applications in speech  
439 recognition. *Proc. IEEE* 77, 257–286.
- 440 Sargolzaei, M., Chesnais, J.P., and Schenkel, F.S. (2011). FImpute - An efficient imputation  
441 algorithm for dairy cattle populations. *J. Dairy Sci.* 94 (*E-Suppl. 1*), 421.
- 442 Scheet, P., and Stephens, M. (2006). A Fast and Flexible Statistical Model for Large-Scale  
443 Population Genotype Data: Applications to Inferring Missing Genotypes and Haplotypic Phase.  
444 *Am. J. Hum. Genet.* 78, 629–644.
- 445 Spiliopoulou, A., Colombo, M., Orchard, P., Agakov, F., and McKeigue, P. (2017). GeneImp:  
446 Fast Imputation to Large Reference Panels Using Genotype Likelihoods from Ultra-Low  
447 Coverage Sequencing. *Genetics*.
- 448 VanRaden, P.M., Null, D.J., Sargolzaei, M., Wiggans, G.R., Tooker, M.E., Cole, J.B.,  
449 Sonstegard, T.S., Connor, E.E., Winters, M., van Kaam, J.B.C.H.M., et al. (2013). Genomic  
450 imputation and evaluation using high-density Holstein genotypes. *J. Dairy Sci.* 96, 668–678.
- 451 Villa-Angulo, R., Matukumalli, L.K., Gill, C.A., Choi, J., Tassell, C.P.V., and Grefenstette, J.J.  
452 (2009). High-resolution haplotype block structure in the cattle genome. *BMC Genet.* 10, 19.
- 453 Williams, A.L., Patterson, N., Glessner, J., Hakonarson, H., and Reich, D. (2012). Phasing of  
454 Many Thousands of Genotyped Samples. *Am. J. Hum. Genet.* 91, 238–251.
- 455

456

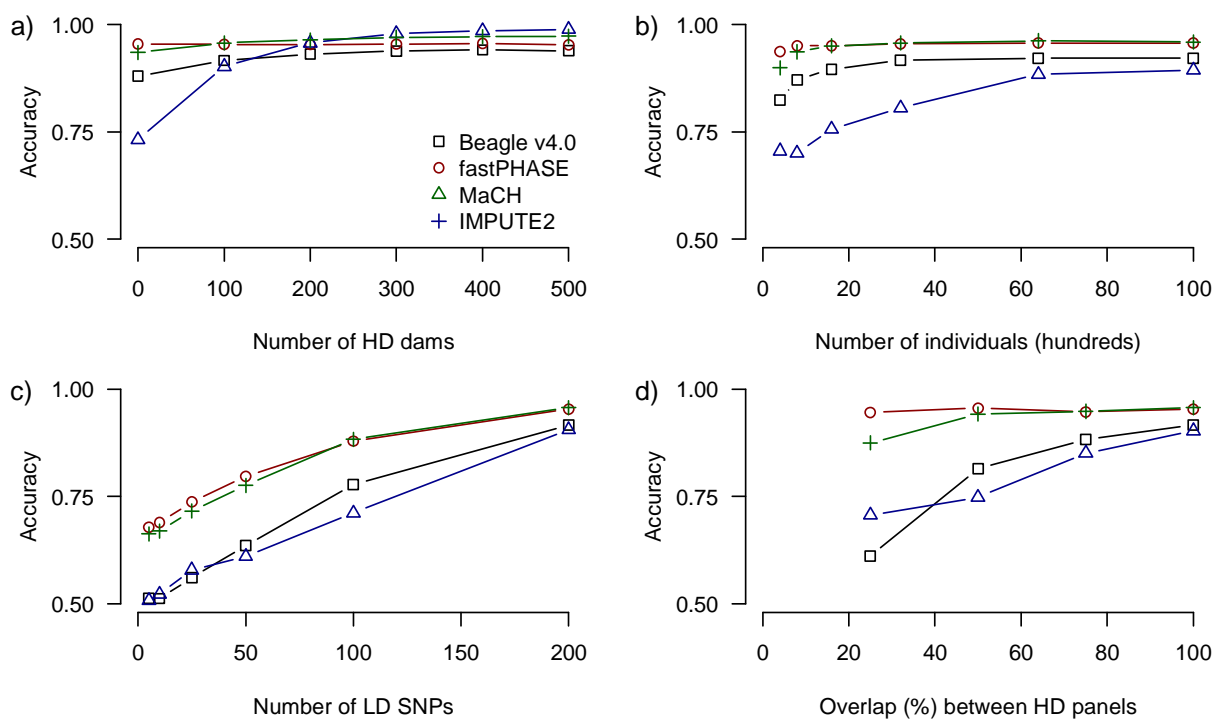

457

458 *Figure 1. Performance of each diploid HMM algorithm for each set of simulations. Unless*  
459 *otherwise noted there were 1000 high-density SNPs, 200 low-density SNPs, 100 dams*  
460 *genotyped at high-density and complete overlap between the high-density arrays of generations*  
461 *1 and 2 and those of 3 and 4. We varied (a) the number of dams genotyped at high-density, (b)*  
462 *the number of individuals in the population, (c) the number of SNPs in the low-density array,*  
463 *and (d) the amount of overlap between the high-density array for generations 1 and 2 and those*  
464 *of 3 and 4.*

465

466

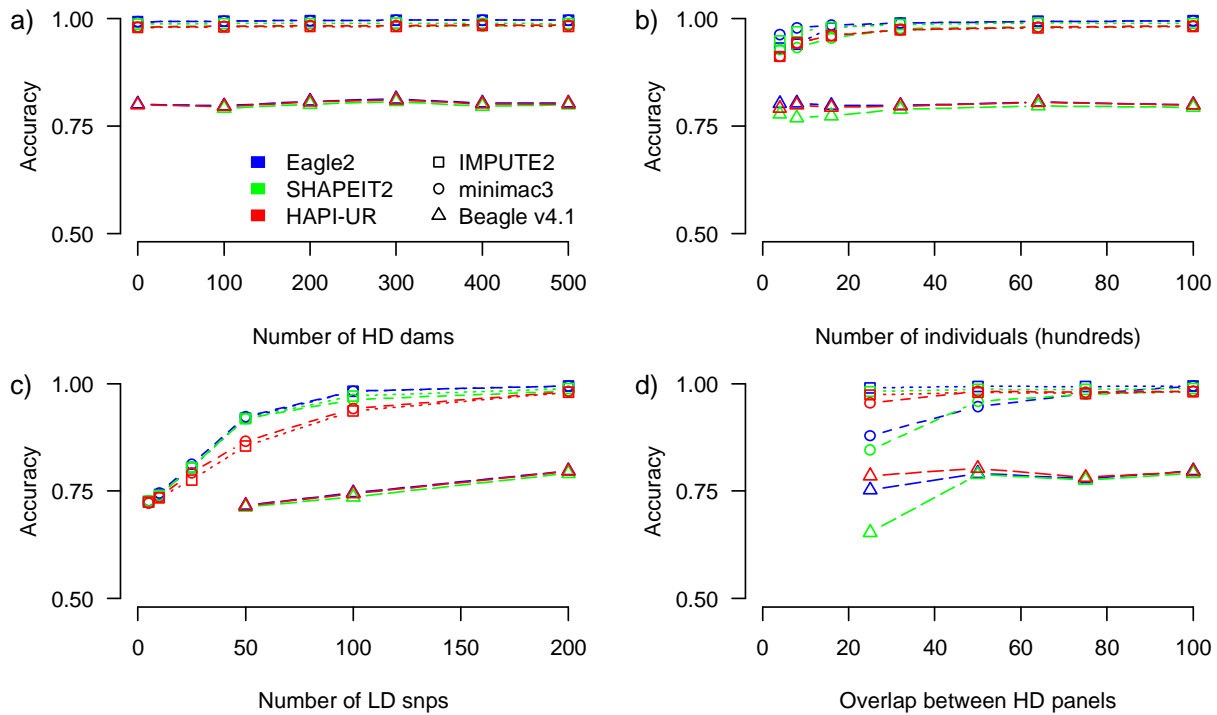

467

468 *Figure 2. Performance of each combination of pre-phasing and haploid HMM method. Unless*  
469 *otherwise noted there were 1000 high-density SNPs, 200 low-density SNPs, 100 dams*  
470 *genotyped at high-density and complete overlap between the high-density arrays of generations*  
471 *1 and 2 and those of 3 and 4. We varied (a) the number of dams genotyped at high-density, (b)*  
472 *the number of individuals in the population, (c) the number of SNPs in the low-density array,*  
473 *and (d) the amount of overlap between the high-density array for generations 1 and 2 and those*  
474 *of 3 and 4.*

475

476

477 Table 3

478 Simulated data: Run time and accuracy for diploid imputation, phasing, and haploid imputation  
479 methods in the baseline scenario. The run time is given in seconds separately for phasing and  
480 imputation steps and as a total.

481

| Phasing method | Imputation method | HD Phasing (s) | LD Phasing (s) | Imputation (s) | Total (s) | Accuracy |
|----------------|-------------------|----------------|----------------|----------------|-----------|----------|
| /              | IMPUTE2           | /              | /              | 42,796         | 42,796    | 0.861    |
| /              | Beagle v4.0       | /              | /              | 23,042         | 23,042    | 0.901    |
| /              | MaCH              | /              | /              | 21,998         | 21,998    | 0.944    |
| /              | fastPHASE         | /              | /              | 28,892         | 28,892    | 0.941    |
| HAPI-UR        | IMPUTE2           | 117            | 14             | 149            | 280       | 0.964    |
| HAPI-UR        | minimac3          | 117            | 14             | 62             | 193       | 0.967    |
| HAPI-UR        | Beagle v4.1       | 117            | 14             | 78             | 209       | 0.793    |
| Eagle2         | IMPUTE2           | 1,361          | 207            | 148            | 1,717     | 0.988    |
| Eagle2         | minimac3          | 1,361          | 207            | 55             | 1,623     | 0.988    |
| Eagle2         | Beagle v4.1       | 1,361          | 207            | 79             | 1,647     | 0.794    |
| SHAPEIT2       | IMPUTE2           | 8,495          | 1,175          | 150            | 9,820     | 0.979    |
| SHAPEIT2       | minimac3          | 8,495          | 1,175          | 58             | 9,728     | 0.977    |
| SHAPEIT2       | Beagle v4.1       | 8,495          | 1,175          | 77             | 9,747     | 0.792    |

482

483



484 Table 4

485 Real data: Run time and accuracy for phasing, and haploid imputation methods on the real  
486 dataset scenario. The run time is given in hours separately for phasing and imputation steps and  
487 as a total. For Eagle2, the program was run distributed across 8 compute cores. HAPI-UR was  
488 run on a single core.

489

| Phasing method | Imputation method | HD Phasing (h) | LD Phasing (h) | Imputation (h) | Total (h) | Accuracy |
|----------------|-------------------|----------------|----------------|----------------|-----------|----------|
| HAPI-UR        | IMPUTE2           | 11.53          | 43.09          | 60.25          | 12.48     | 0.997    |
| HAPI-UR        | minimac3          | 11.53          | 43.09          | 56.89          | 9.06      | 0.995    |
| HAPI-UR        | Beagle v4.1       | 11.53          | 43.09          | 57.32          | 11.04     | 0.939    |
| Eagle2         | IMPUTE2           | 4.48 (8 cores) | 2.37 (8 cores) | 5.63           | 12.48     | 0.827    |
| Eagle2         | minimac3          | 4.48 (8 cores) | 2.37 (8 cores) | 2.21           | 9.06      | 0.992    |
| Eagle2         | Beagle v4.1       | 4.48 (8 cores) | 2.37 (8 cores) | 4.19           | 11.04     | 0.925    |

490
